# Supplementary material for: Essential role of accessory subunit LYRM6 in the mechanism of mitochondrial complex I
Source: Nat Commun. 2020 Nov 26;11:6008. doi: 10.1038/s41467-020-19778-7 (PMC7693276; doi:10.1038/s41467-020-19778-7)
Supplement: Supplementary file 4 — Source Data [file 41467_2020_19778_MOESM4_ESM.xlsx]

## Sheet: Source Data_Suppl. Table 1
Supplementary Table 1
Mitochondrial membranes
	Biological replicate 1									Biological replicate 2								Calculations	mean U/mg		mean U/mg	mean					mean	mean
	HAR 1 U/mL	HAR 2 U/mL	DBQ 1 U/mL	DBQ 2 U/mL	HAR 1 U/mg	HAR 2 U/mg	DBQ 1 U/mg	DBQ 2 U/mg		HAR 1 U/mL	HAR 2 U/mL	DBQ 1 U/mL	DBQ 2 U/mL	HAR 1 U/mg	HAR 2 U/mg	DBQ 1 U/mg	DBQ 2 U/mg		HAR 1-4	SD	DBQ 1-4	SD	DBQ/HAR 1	DBQ/HAR 2	DBQ/HAR 3	DBQ/HAR 4	DBQ/HAR	SD	CI activity [%]	SD [%]
LYRM6 parental	33.51	34.2	19.1	19.87	0.751345	0.766816	0.428251	0.445516	LYRM6 parental	46.5995	47.6623	19.4561	20.2622	1.3201	1.35021	0.551164	0.573999	parental NB4M	1.04712	0.332882	0.499733	0.0735069	0.569979	0.592957	0.417517	0.425119	0.501393	0.092989	100	18.5978
D41A	45.15	45.95	5.16	6.63	0.936722	0.95332	0.107054	0.137552	D41A	45.2328	44.7636	5.9197	5.93075	1.19663	1.18422	0.156606	0.156898	D41A	1.06772	0.141939	0.139527	0.0234652	0.114286	0.146844	0.130872	0.13249	0.131123	0.0133238	26.2246	2.66476
L42A	46.07	46.65	5.83	6.84	0.963808	0.975941	0.121967	0.143096	L42A	47.6628	47.8415	4.4746	4.85225	1.24772	1.2524	0.117136	0.127022	L42A	1.10997	0.16185	0.127305	0.0112746	0.126547	0.14847	0.0938803	0.101423	0.11758	0.0248816	23.516	4.97632
Y43A	43.16	44.32	3.28	2.54	0.902929	0.927197	0.0686192	0.0531381	Y43A	46.8999	46.5962	3.1557	3.75395	1.14951	1.14206	0.0773456	0.0920086	Y43A	1.03042	0.13361	0.0727779	0.0162655	0.0759963	0.0588508	0.0672859	0.0805634	0.0706741	0.00961588	14.1348	1.92318
E44A	50.07	51.28	8.34	6.68	0.946503	0.969376	0.157656	0.126276	E44A	57.7163	57.1234	9.4981	10.4718	1.5391	1.52329	0.253283	0.279248	E44A	1.24457	0.331164	0.204116	0.0736654	0.166567	0.133413	0.164565	0.183319	0.161966	0.0208097	32.3932	4.16194
N88A	48.88	49.32	5.93	6.97	0.906865	0.915028	0.110019	0.129314	N88A	49.8706	49.2692	7.2298	7.26885	1.19881	1.18436	0.173793	0.174732	N88A	1.05127	0.162168	0.146964	0.0324929	0.121318	0.142594	0.144971	0.147533	0.139104	0.012028	27.8208	2.4056
F89A	44.81	42.57	3.6	3.03	0.875195	0.831445	0.0703125	0.0591797	F89A	45.8475	48.2596	3.0059	3.2041	1.20335	1.26666	0.078895	0.0840971	F89A	1.04416	0.222592	0.0731211	0.0108944	0.0803392	0.0676188	0.065563	0.066393	0.0699785	0.00695856	13.9957	1.39171
LYRM6 parental 2.	39.26	37.06	21.16	18.72	1.32995	1.25542	0.716802	0.634146	LYRM6 parental 2.	52.2628	52.9582	24.2033	24.0566	1.23261	1.24901	0.570833	0.567373	parental NB4M 2.	1.26675	0.0432125	0.622288	0.0700878	0.538971	0.476821	0.463108	0.454256	0.483289	0.0382644	96.6578	7.97175
W90A	46.83	47	7.48	7.53	1.1977	1.20205	0.191304	0.192583	W90A	50.7749	49.384	8.1153	8.10575	1.21471	1.18144	0.194146	0.193917	W90A	1.19897	0.0137393	0.192988	0.00131698	0.159727	0.160794	0.159829	0.164137	0.161122	0.002067	32.2244	0.4134
K91A	49.88	50.17	18.64	20.12	1.18199	1.18886	0.441706	0.476777	K91A	49.2641	48.9263	19.2916	19.345	1.28964	1.28079	0.505016	0.506414	K91A	1.23532	0.0577938	0.482478	0.0304177	0.373697	0.403368	0.391596	0.395391	0.391013	0.0125432	78.2026	2.50865
Q92A	51.05	49.46	7.73	10.04	1.28266	1.24271	0.194221	0.252261	Q92A	51.8682	48.5751	10.3481	9.68915	1.18692	1.11156	0.236799	0.22172	Q92A	1.20596	0.0741813	0.22625	0.0247267	0.15142	0.19667	0.199508	0.199467	0.186766	0.0236015	37.3533	4.7203
Q93A	47.02	48.38	21.82	18.45	1.03568	1.06564	0.480617	0.406388	Q93A	44.2314	44.5983	18.0422	18.0054	1.19544	1.20536	0.487627	0.486634	Q93A	1.12553	0.0874072	0.465316	0.0394077	0.464058	0.392386	0.407905	0.403725	0.417018	0.0320376	83.4037	6.40752
	mean				mean DBQ/HAR 1-4
	HAR 1-4	Sd 1-4	CI content / HAR [%]	SD [%]	DBQ/CI [%]	SD [%]
LYRM6 parental 2.	1.26675	0.0432125	100	3.40256	100	8
D41A	1.06772	0.141939	84.0728	11.1763	26.2246	2.66476
L42A	1.10997	0.16185	87.3988	12.7441	23.516	4.97632
Y43A	1.03042	0.13361	81.1358	10.5205	14.1348	1.92318
E44A	1.24457	0.331164	97.9975	26.0759	32.3932	4.16194
N88A	1.05127	0.162168	82.7768	12.7691	27.8208	2.4056
F89A	1.04416	0.222592	82.2174	17.5269	13.9957	1.39171
W90A	1.19897	0.0137393	94.4073	1.08184	32.2244	0.4134
K91A	1.23532	0.0577938	97.2693	4.5507	78.2026	2.50865
Q92A	1.20596	0.0741813	94.9577	5.84105	37.3533	4.7203
Q93A	1.12553	0.0874072	88.6245	6.88246	83.4037	6.40752
Purified complex I
	HAR U/mL/mg	DBQ U/mL/mg	DBQ/HAR	mean	SD	mean DBQ/CI [%]	SD [%]
parental GB30	78.7547	22.1856	0.281705	0.279263	0.0083645	99.7367	2.98732
parental GB30	76.4377	21.8714	0.286134
parental GB30	75.982	20.5113	0.269949
L42A	28.675	2.68209	0.0935339	0.0887998	0.00981453	31.7142	3.50519
L42A	28.5279	2.72013	0.0953499
L42A	29.2796	2.26962	0.0775155
Y43A	25.639	1.43479	0.0559613	0.0577775	0.00163773	20.6348	0.584903
Y43A	25.7296	1.49821	0.058229
Y43A	25.4997	1.50811	0.059142
F89A	32.1529	0.723755	0.0225098	0.03376	0.00983671	12.0572	3.51311
F89A	32.4497	1.32199	0.0407396
F89A	32.2813	1.22768	0.0380307
Purified complex I
	HAR	SD	DBQ	SD	DBQ/HAR	DBQ/CI [%]	SD DBQ activity [%]
parental GB30	77.0581	1.48682	21.5228	0.889953	0.279306	100	4.13932
L42A	28.8275	0.398364	2.55728	0.249844	0.0887097	31.6821	1.16207
Y43A	25.6228	0.115778	1.48037	0.0397786	0.0577755	20.6341	0.185017
F89A	32.2946	0.148817	1.09114	0.32164	0.0337871	12.0668	1.496

## Sheet: Source Data_Suppl. Table 3
Supplementary Table 3
Mitochondrial membranes
	Biological replicate 1									Biological replicate 2								Calculations	mean U/mg		mean U/mg	mean					mean	mean
	HAR 1 U/mL	HAR 2 U/mL	DBQ 1 U/mL	DBQ 2 U/mL	HAR 1 U/mg	HAR 2 U/mg	DBQ 1 U/mg	DBQ 2 U/mg		HAR 1 U/mL	HAR 2 U/mL	DBQ 1 U/mL	DBQ 2 U/mL	HAR 1 U/mg	HAR 2 U/mg	DBQ 1 U/mg	DBQ 2 U/mg		HAR 1-4	SD	DBQ 1-4	SD	DBQ/HAR 1	DBQ/HAR 2	DBQ/HAR 3	DBQ/HAR 4	DBQ/HAR	SD	CI activity [%]	SD [%]
NDUFS2 parental	46.18	49.8	25.37	23.62	0.912648	0.98419	0.501383	0.466798	NDUFS2 parental	45.5383	44.36	23.5793	23.4801	1.16765	1.13744	0.604597	0.602054	parental 49-kDa	1.05048	0.122041	0.543708	0.0702809	0.549372	0.511477	0.517791	0.529308	0.526987	0.0166495	100	3.3299
T84A	38.23	38.43	3.53	2.54	0.809958	0.814195	0.0747881	0.0538136	T84A	31.8435	32.0736	3.8295	3.45525	0.84916	0.855296	0.10212	0.09214	T84A	0.832152	0.0233806	0.0807154	0.0211937	0.0923359	0.06644	0.12026	0.107729	0.0966912	0.0231763	18.2436	4.63526
N86A	46.85	45.19	2.07	1.68	0.931412	0.89841	0.0411531	0.0333996	N86A	46.1141	43.2395	2.5655	1.67043	1.31755	1.23541	0.0733	0.0477267	N86A	1.0957	0.211857	0.0488948	0.0172917	0.0441836	0.0358591	0.0556337	0.0386321	0.0435771	0.0087512	8.2221	1.75024
parental PSST	42.8	45.3	26.6	22.56	0.916488	0.970021	0.569593	0.483084	parental PSST	42.1215	44.2083	23.4469	23.1322	1.20347	1.26309	0.669911	0.660921	parental PSST	1.08827	0.170613	0.595877	0.0877973	0.621495	0.527103	0.556649	0.523256	0.557126	0.0454321	100	9.08641
Q133A-PSST	49.7	47.6	1.4	1.84	0.997992	0.955823	0.0281124	0.0369478	Q133A-PSST	39.9326	38.5132	1.5687	1.6909	1.14093	1.10038	0.04482	0.0483114	Q133A-PSST	1.04878	0.0863607	0.0395479	0.00898377	0.028169	0.0370221	0.0392837	0.0439044	0.0370948	0.00660397	6.62407	1.32079
NDUFS2 parental	45.5	44.4	23.6	24.4	1.16	1.14	0.6	0.6	NDUFS2 parental	21.5	27.6	13.4	12.5	0.873984	1.12195	0.544715	0.50813	NDUFS2 parental	1.07398	0.134236	0.563211	0.0450291	0.518681	0.54955	0.623256	0.452899	0.536096	0.0707176	100	13.0958
F83A	23.1	23	1.4	1.3	1.05	1.04	0.03	0.07	F83A	44.09	41.98	1.4	2.45	1.07015	1.01893	0.0339806	0.059466	F83A	1.04477	0.0213044	0.0483617	0.019455	0.0606061	0.0565217	0.0317532	0.0583611	0.0518105	0.0134754	9.59454	2.49545
I85A	25.4	26	1.7	1.9	1.23	1.26	0.06	0.058	I85A	39.4	39.3	0.9	1.7	1.12571	1.12286	0.0257143	0.0485714	I85A	1.18464	0.070772	0.0480714	0.0157158	0.0669291	0.0730769	0.0228426	0.043257	0.0515264	0.0230421	9.54193	4.26705
F87A	27.6	27.6	0.2	0.6	1.12653	1.12653	0.00816327	0.0244898	F87A	34	35.6	0.6	1.4	0.934066	0.978022	0.0164835	0.0384615	F87A	1.04129	0.100053	0.0218995	0.0128974	0.00724638	0.0217391	0.0176471	0.0393258	0.0214896	0.0133645	3.97956	2.4749
L447A	46.2	43.3	2.5	2.6	1.21579	1.13947	0.302632	0.328947	L447A	41.8	43.5	1.3	0.9	1.13587	1.18207	0.0353261	0.0244565	L447A	1.1683	0.0379799	0.17284	0.165472	0.0541126	0.0600462	0.0311005	0.0206897	0.0414872	0.0186571	7.68282	3.45501
P448A	23.4	24	11.5	12.5	1.20619	1.23711	0.592784	0.64433	P448A	38.4	38.6	18	17.3	1.21136	1.21767	0.567823	0.545741	P448A	1.21808	0.0135293	0.58767	0.0423808	0.491453	0.520833	0.46875	0.448187	0.482306	0.0311765	89.3159	5.77343
V451A	36.8	37.3	5.2	6.2	1.07602	1.09064	0.152047	0.181287	V451A	41.8	39.8	5.5	4.4	0.908696	0.865217	0.119565	0.0956522	V451A	0.985145	0.114914	0.137138	0.0374221	0.141304	0.16622	0.131579	0.110553	0.137414	0.0230975	25.447	4.27732
NDUFS7 parental	40.8	41.7	26.2	21.3	0.86	0.87	0.545833	0.44375	NDUFS7 parental	39.91	38.94	27.3	21.3	0.894843	0.873094	0.612108	0.477578	NDUFS7 parental	0.874484	0.0146778	0.519817	0.0747545	0.642157	0.510791	0.684039	0.546995	0.595996	0.080712	100	14.9467
Q137A	41.8	40.2	2.3	3.3	1.12	1.08	0.0616622	0.0884718	Q137A	43.9	42.96	3.8	3.5	1.28363	1.25614	0.111111	0.102339	Q137A	1.18494	0.100063	0.0908961	0.0216032	0.0550239	0.0820896	0.0865604	0.0814711	0.0762862	0.0143551	12.7144	2.39251
	mean				mean DBQ/HAR 1-4
	HAR 1-4	SD 1-4	CI content/HAR [%]	SD [%]	DBQ/CI [%]	SD [%]
NDUFS2 parental	1.05048	0.122041	100	11.6229	105.397	3.3299
T84A	0.832152	0.0233806	79.2526	2.22673	19.3382	4.63526
N86A	1.0957	0.211857	104.352	20.1768	8.71543	1.75024
NDUFS7 parental	1.08827	0.170613	100	15.6526	111.425	9.08641
Q133A	1.04878	0.0863607	96.2184	7.923	7.41896	1.32079
NDUFS2 parental	1.07	0.13	100	12.1495	100	13.1
F83A	1.04	0.02	97.1963	1.86916	9.6	2
I85A	1.18	0.07	110.28	6.54206	9	4
F87A	1.04	0.1	97.1963	9.34579	3.7	3
L447A	1.17	0.04	109.346	3.73832	8	3
P448A	1.22	0.01	114.019	0.934579	88.5	6
V451A	0.99	0.11	92.5234	10.2804	24.8	4
NDUFS7 parental	0.87	0.01	100	1.14943	100	14.9
Q137A	1.18	0.1	135.632	11.4943	13	2

## Sheet: Source Data_Suppl. Fig. 3
Supplementary Fig. 3
Mitochondrial membranes
	Coomassie-stained BN-PAGE gel
	sampes x and y are not part of the publication
